# Supplementary material for: A comparison of three optical absorption photometers at a boreal forest site – effects of different correction algorithms
Source: Copernicus journal article supplement (doi:10.5194/amt-2020-325), 2020-09-08
Supplement: Supplementary file 1 [file amt-2020-325-supplement.pdf]

## S1 The seasonal variation of $C_{\text{ref}}$

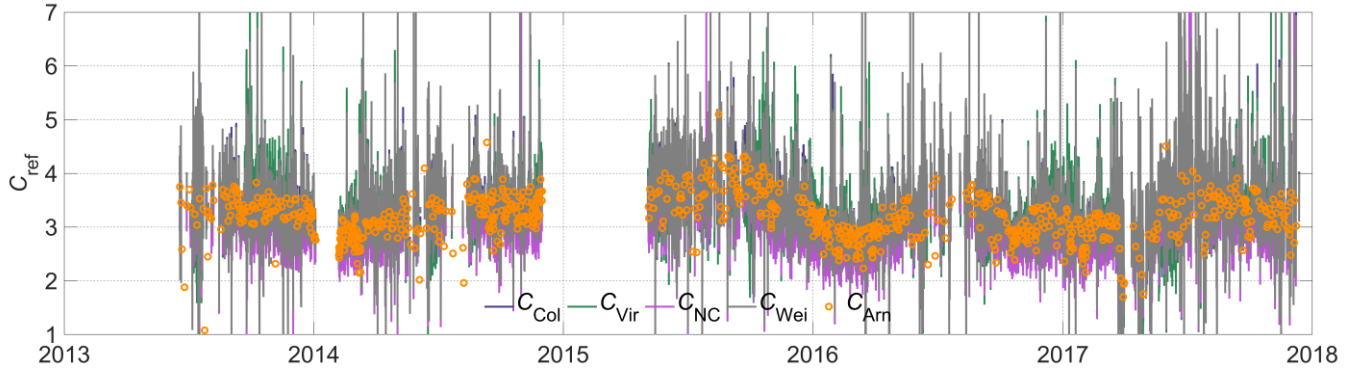

**Figure S1. The time series of  $C_{\text{ref}}$  for different correction algorithms.**

The time series of  $C_{\text{ref}}$ , presented in Fig. S1, already indicates that the  $C_{\text{ref}}$  has a seasonal cycle. From the time series it seems  
5 that the  $C_{\text{ref}}$  has its minima in spring. During the summer the  $C_{\text{ref}}$  increases and reaches its maxima in autumn. The seasonal  
variation of the  $C_{\text{ref}}$  is studied in more detail in Figs. S2a-e, where the average values of the  $C_{\text{ref}}$  for different algorithms are  
presented for each month separately.

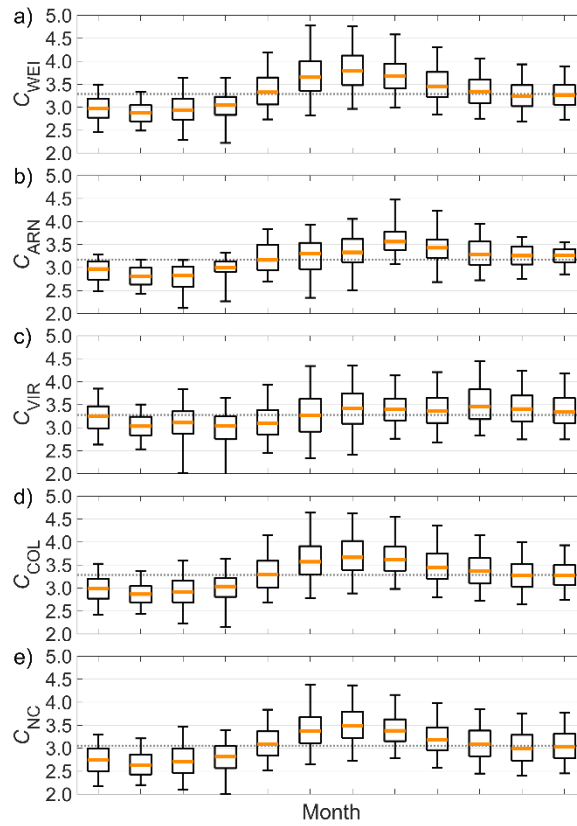

**Figure S2: The monthly statistics of the  $C_{\text{ref}}$  for different correction algorithms. The orange line in the middle represents the monthly median, the edges of the boxes are the 25<sup>th</sup> and 75<sup>th</sup> percentiles and the whiskers are the 5<sup>th</sup> and 95<sup>th</sup> percentiles.**

## S2 The time series of the compensation parameter

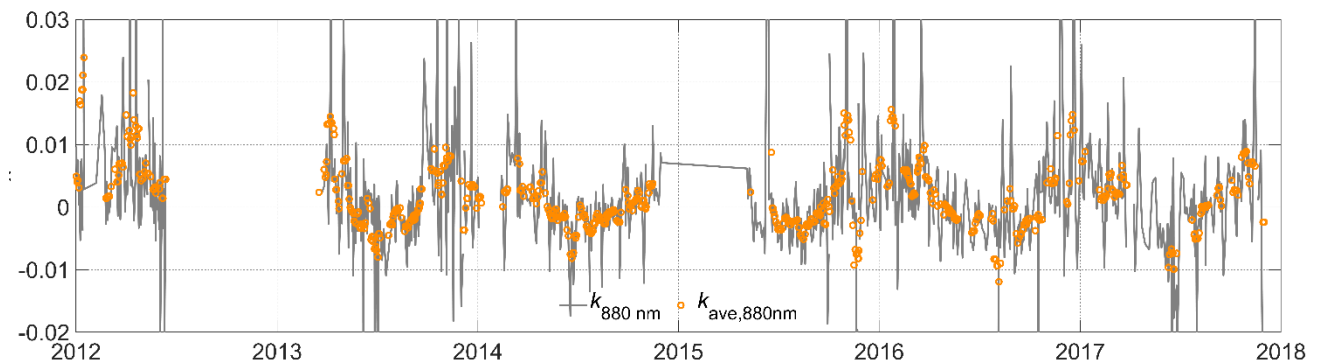

**Figure S3: Time series of the compensation parameter ( $k$ ) at 880 nm. The figure is presented for both “raw”  $k$  values and the averaged ones.**
